# Supplementary material
Source: Elsevier journal article supplement (https://www.sciencedirect.com/science/article/pii/S0213485320300451)
Supplement: mmc1 [file S0213485320300451:mmc1.pdf]

## Apéndice 1\_resultados del proceso de consenso

1a RONDA CORREO ELECTRÓNICO: Se circularon un total de 20 recomendaciones:

- 13 recomendaciones fueron aceptados sin modificación
- 7 fueron modificados en base a los comentarios proporcionados por el grupo de expertos

FIN DE RONDA 1:

- 13 recomendaciones se incorporaron en el documento
- 7 recomendaciones modificadas fueron sometidas a una segunda ronda de consenso

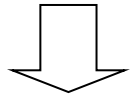

2a RONDA CORREO ELECTRÓNICO: Se circularon 7 recomendaciones modificadas y todas fueron aceptadas sin cambios adicionales

FIN DE RONDA 2: las 7 recomendaciones se incorporaron en el documento

|                                                                                                                                                                                                                                                                                                                                                                                                                                                                                                                                                                                                                                                                                                                                                                                                                                                | <b>Acuerdo final *</b> |             |              |
|------------------------------------------------------------------------------------------------------------------------------------------------------------------------------------------------------------------------------------------------------------------------------------------------------------------------------------------------------------------------------------------------------------------------------------------------------------------------------------------------------------------------------------------------------------------------------------------------------------------------------------------------------------------------------------------------------------------------------------------------------------------------------------------------------------------------------------------------|------------------------|-------------|--------------|
| <b>Recomendación</b>                                                                                                                                                                                                                                                                                                                                                                                                                                                                                                                                                                                                                                                                                                                                                                                                                           | Bajo (1-3)             | Medio (4-6) | Alto (7-9)   |
| <b>Aspectos generales de la vacunación</b>                                                                                                                                                                                                                                                                                                                                                                                                                                                                                                                                                                                                                                                                                                                                                                                                     |                        |             |              |
| <b>R1.</b> Siempre que la situación clínica del paciente lo permita, se recomienda que las vacunas se administren en el momento del diagnóstico y siempre antes de iniciar un tratamiento inmunosupresor..                                                                                                                                                                                                                                                                                                                                                                                                                                                                                                                                                                                                                                     |                        |             | <b>100%</b>  |
| <b>R2.</b> Si el hospital donde se atiende habitualmente al paciente dispone de Servicio de Medicina Preventiva con consulta de vacunación se recomienda derivar al paciente a dicho servicio.                                                                                                                                                                                                                                                                                                                                                                                                                                                                                                                                                                                                                                                 | 11,1%                  | 5,6%        | <b>83,3%</b> |
| <b>Establecer las necesidades vacunales</b>                                                                                                                                                                                                                                                                                                                                                                                                                                                                                                                                                                                                                                                                                                                                                                                                    |                        |             |              |
| <b>R3.</b> Para determinar las necesidades vacunales se recomienda una doble estrategia:<br>- Documentar los antecedentes de vacunación del paciente, con especial énfasis en gripe estacional, neumococo, virus de la hepatitis A y B, tétanos-difteria, varicela y sarampión<br>- Realizar serologías pre-vacunales que incluyan los siguientes marcadores: anticuerpos tipo IgG frente al virus de la hepatitis A (IgG VHA), antígeno de superficie del virus de la hepatitis B (HBsAg), anticuerpo anti-core frente al virus de la hepatitis B (AntiHBc), anticuerpo frente al antígeno de superficie del virus hepatitis B (AntiHBs), anticuerpos tipo IgG frente al virus del sarampión, anticuerpos tipo IgG frente al virus de la rubeola (esto sólo en mujeres en edad fértil) y anticuerpos tipo IgG frente al virus de la varicela. | 5,6%                   | 0%          | <b>94,4%</b> |
| <b>Vacunación en pacientes con EM candidatos a tratamiento inmunosupresor que aún no han comenzado el tratamiento</b>                                                                                                                                                                                                                                                                                                                                                                                                                                                                                                                                                                                                                                                                                                                          |                        |             |              |
| Estos pacientes deber ser inmunizados lo antes posible frente a (para mas detalles ver tabla 1 del documento):                                                                                                                                                                                                                                                                                                                                                                                                                                                                                                                                                                                                                                                                                                                                 |                        |             |              |
| <b>R4. 1.</b> Vacunas sistemáticas de calendario del adulto:<br>- Tétanos (1 dosis de vacuna dT o dTpa) en caso de que no haya recibido una dosis de recuerdo en los últimos 10 años y se considere que ha recibido las tres dosis de primovacunación.<br>- Varicela y/o triple vírica (2 dosis separadas por un mínimo de 4 semanas) en caso de presentar una serología negativa.                                                                                                                                                                                                                                                                                                                                                                                                                                                             | 5,6%                   | 11,1%       | <b>83,3%</b> |
| <b>R5.</b> Hepatitis B: Se recomienda la primovacunación frente hepatitis B en pacientes con HBsAc negativo si presentan riesgo de exposición (ver texto). En caso de que el paciente no vaya a recibir ningún tratamiento inmunosupresor en los próximos 6 meses, se puede plantear la vacuna frente a VHB a dosis y pauta estándar (0, 1, 6m). En pacientes que vayan a iniciar tratamiento inmunosupresor en los siguientes 6 meses, se utilizarán vacunas de inmunidad reforzada (adyuvadas o de alta carga)                                                                                                                                                                                                                                                                                                                               | 5,6%                   | 5,6%        | <b>88,9%</b> |
| <b>R6.</b> Neumococo: Se recomienda la realización de una pauta secuencial que implica la administración de una dosis de vacuna antineumocócica conjugada 13-valente y una dosis de vacuna antineumocócica 23-valente a partir de los 2 meses de la anterior.                                                                                                                                                                                                                                                                                                                                                                                                                                                                                                                                                                                  | 5,6%                   | 5,6%        | <b>88,9%</b> |
| <b>R7</b> Gripe: Se recomienda la administración de una dosis de vacuna antigripal anualmente, en cualquier momento de la temporada gripal (octubre- marzo) y de forma preferente durante los meses de octubre y noviembre.                                                                                                                                                                                                                                                                                                                                                                                                                                                                                                                                                                                                                    | 0%                     | 5,6%        | <b>94,4%</b> |

|                                                                                                                                                                                                                                                                                                                                                                                                                                                                                                                                                                                                      |       |       |              |
|------------------------------------------------------------------------------------------------------------------------------------------------------------------------------------------------------------------------------------------------------------------------------------------------------------------------------------------------------------------------------------------------------------------------------------------------------------------------------------------------------------------------------------------------------------------------------------------------------|-------|-------|--------------|
| <b>R8.</b> Hepatitis A: Se recomienda la primovacunación frente hepatitis A en pacientes susceptibles que tengan alto riesgo de exposición debido a conductas sexuales de riesgo y abuso de sustancias, presencia de comorbilidades específicas, riesgo ocupacional y/o viajes internacionales a zonas endémicas                                                                                                                                                                                                                                                                                     | 0%    | 11,1% | <b>88,9%</b> |
| <b>R9.</b> Virus del papiloma humano (VPH): Se recomienda la vacunación en mujeres hasta los 26 años de edad, preferentemente con la vacuna nonavalente                                                                                                                                                                                                                                                                                                                                                                                                                                              | 0%    | 5,6%  | <b>94,4%</b> |
| <b>R10.</b> Herpes zóster: Se recomienda la administración de la vacuna inactivada frente a herpes zóster en pacientes de 50 años o más con antecedente de infección por varicela                                                                                                                                                                                                                                                                                                                                                                                                                    | 0%    | 16,7% | <b>83,3%</b> |
| <b>R11.</b> Haemophilus influenzae y vacunación antimeningocócica sólo estarían recomendadas en situaciones de asplenia o sospecha de hipoesplenismo funcional                                                                                                                                                                                                                                                                                                                                                                                                                                       | 0%    | 5,6%  | <b>94,4%</b> |
| <b>R12.</b> Para aquellas vacunas que dispongan de un correlato de protección se recomienda la monitorizar la respuesta serológica transcurridos 1-2 meses de la última dosis.                                                                                                                                                                                                                                                                                                                                                                                                                       | 0%    | 0%    | <b>100%</b>  |
| <b>R13.</b> Se deberá respetar un intervalo mínimo desde la última dosis de vacuna y el inicio de un tratamiento inmunosupresor según se especifica a continuación:<br>- Para vacunas inactivadas: No es necesario respetar ningún intervalo de seguridad aunque es preferible administrarlas al menos 2 semanas antes del inicio de la inmunosupresión para garantizar una mejor respuesta inmune.<br>- Para vacunas atenuadas es necesario esperar al menos 4 semanas hasta iniciar un tratamiento inmunosupresor. Para el caso de ocrelizumab y alemtuzumab la ficha técnica especifica 6 semanas | 0%    | 5,6%  | <b>94,4%</b> |
| <b>Vacunación en pacientes con EM que actualmente reciben tratamiento inmunosupresor</b>                                                                                                                                                                                                                                                                                                                                                                                                                                                                                                             |       |       |              |
| <b>R14.</b> En estos pacientes se valorarían las mismas vacunas que se han especificado en el grupo anterior teniendo en cuenta que las vacunas inactivadas se pueden administrar sin problemas de seguridad durante el tratamiento inmunosupresor, pero la respuesta inmunógena puede ser menor fundamentalmente en el caso de los fármacos con mayor poder inmunosupresor (Rituximab, Cladribina, Ocrelizumab y Alemtuzumab)                                                                                                                                                                       | 0%    | 11,1% | <b>88,9%</b> |
| <b>R15.</b> Debido al riesgo de falta de respuesta vacunal, se recomienda el uso de vacunas con inmunidad reforzada (en el caso de la vacunación frente a VHB), y monitorizar la respuesta serológica transcurrido un mes de la última dosis de aquellas vacunas para las que haya correlato de protección.                                                                                                                                                                                                                                                                                          | 5,6%  | 0%    | <b>94,4%</b> |
| <b>R16.</b> Las vacunas atenuadas están contraindicadas en estos pacientes. Si el paciente es susceptible a varicela o sarampión y presenta un contacto de riesgo, deberá recibir profilaxis post-exposición                                                                                                                                                                                                                                                                                                                                                                                         | 0%    | 0%    | <b>100%</b>  |
| <b>R17.</b> Si no se ha podido realizar la vacunación previa al inicio del tratamiento, se considerará inmunizar al paciente en el futuro en caso de que en algún momento se suspenda la medicación inmunosupresora. En ese caso se debe tener en cuenta los plazos de seguridad para cada fármaco, especificados en la tabla 2 del documento.                                                                                                                                                                                                                                                       | 11,1% | 0%    | <b>88,9%</b> |

| <b>Vacunación en pacientes con EM en situaciones especiales</b>                                                                                                                                                                                                                                                                                                                                                                                                                                                                                                                 |    |      |       |
|---------------------------------------------------------------------------------------------------------------------------------------------------------------------------------------------------------------------------------------------------------------------------------------------------------------------------------------------------------------------------------------------------------------------------------------------------------------------------------------------------------------------------------------------------------------------------------|----|------|-------|
| <b>R18.</b> En caso de que el paciente planea un viaje a destino tropical o subtropical deberá hacer una consulta a un centro especializado para que se realice la valoración en indicación vacunal individualizada considerando el beneficio-riesgo en cada caso.                                                                                                                                                                                                                                                                                                              | 0% | 0%   | 100%  |
| <b>R19.</b> Las dos vacunas especialmente recomendadas durante el embarazo son:<br>- Vacunación antigripal al principio de la temporada gripal (octubre – noviembre) en cualquier trimestre del embarazo.<br>- Vacunación frente difteria, tétanos y tos ferina dTpa a partir de la semana 27 de gestación y preferentemente entre las semanas 27 y 36, a fin de garantizar la mayor transferencia materno-fetal de anticuerpos anti-tosferina. Su administración se debe realizar durante cada embarazo, independientemente de si se ha administrado previamente la vacuna dT. | 0% | 5,6% | 94,4% |
| <b>R20.</b> Los convivientes y contactos estrechos del paciente con EM en tratamiento inmunosupresor, deben recibir la vacuna antigripal anual. Los convivientes no inmunes frente a sarampión y/o varicela (por vacunación o inmunidad natural) también deben recibir la vacuna triple vírica y/o varicela, sólo en el caso de que el paciente no esté correctamente inmunizado frente a estas infecciones.                                                                                                                                                                    | 0% | 0%   | 100%  |

\*Basado en los resultados de votación en base a la escala Likert (1-9) agrupados en 3 categorías (1–3: estrategia inapropiada; 4–6: estrategia incierta; 7–9: estrategia apropiada). Punto de corte para establecer acuerdo 80%
